# Supplementary material for: Synthesis of Mn2+:CsPb (Br1−xClx)3perovskite quantum dots in an ambient atmosphere: stability analysis and self-powered photodetector applications
Source: Royal Society of Chemistry journal article supplement (doi:10.1039/d2nj06191k), 2023-01-01
Supplement: d2nj06191k1.pdf [file d2nj06191k1.pdf]

## SUPPORTING INFORMATION

### Synthesis of $\text{Mn}^{2+}$ : $\text{CsPb}(\text{Br}_{1-x}\text{Cl}_x)_3$ perovskite quantum dots in an ambient atmosphere: stability analysis and self-powered photodetector applications

Malavika. A<sup>a</sup>, Swapnika Suresh<sup>a</sup>, Mohan Raj Subramaniam<sup>a</sup> and Sudip K Batabyal<sup>\*a</sup>

<sup>a</sup>Department of Sciences, Amrita School of Physical Sciences, Coimbatore, Amrita Vishwa Vidyapeetham, Tamil Nadu, India.

<sup>b</sup>Amrita Center for Industrial Research & Innovation (ACIRI), Amrita School of Engineering, Coimbatore, Amrita Vishwa Vidyapeetham, Tamil Nadu, India.

#### OBSERVATIONS

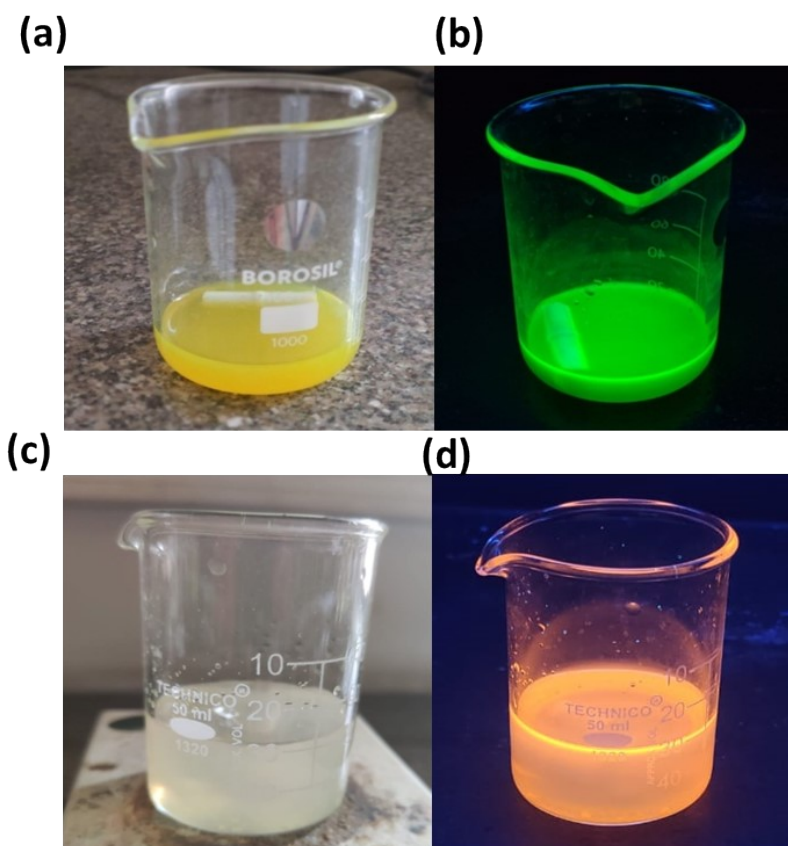

Fig. S1 (a) and (c) represents  $\text{CsPbBr}_3$  and Mn doped  $\text{CsPbBr}_3$  QDs under ambient light condition (b) and (d) indicates  $\text{CsPbBr}_3$  and Mn doped  $\text{CsPbBr}_3$  QDs while irradiating under UV light of 365 nm

**STABILITY STUDY UNDER UV RADIATION (Wavelength - 365 nm)**

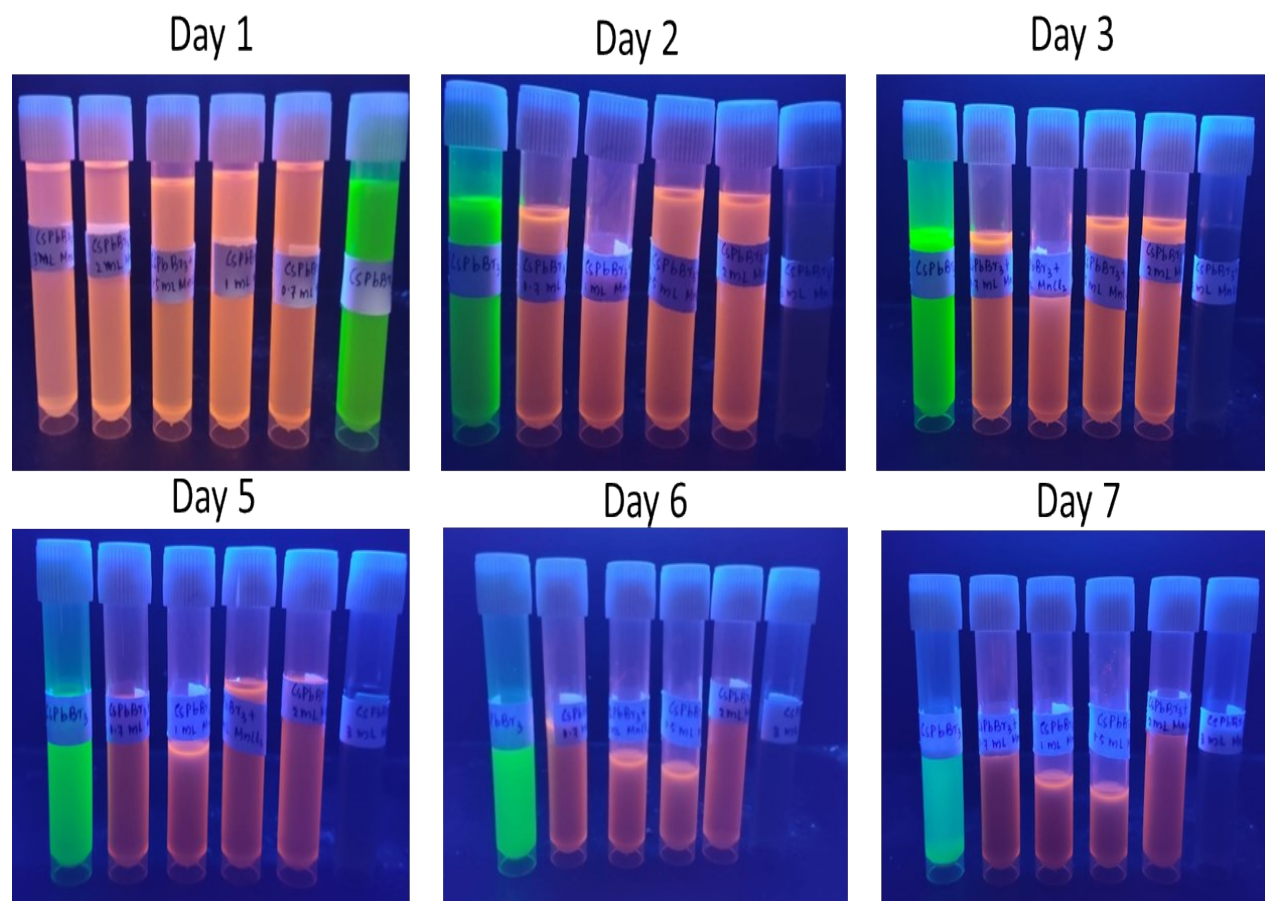

Fig. S2 Stability observation under UV-365 nm for CsPbBr<sub>3</sub> QDs and different concentration of Mn doped CsPbBr<sub>3</sub> QDs (a) Day 1 (b) Day 2 (c) Day 3 (d) Day 5 (e) Day 6 (f) Day 7

## STABILITY ANALYSIS WITH PL SPECTRA

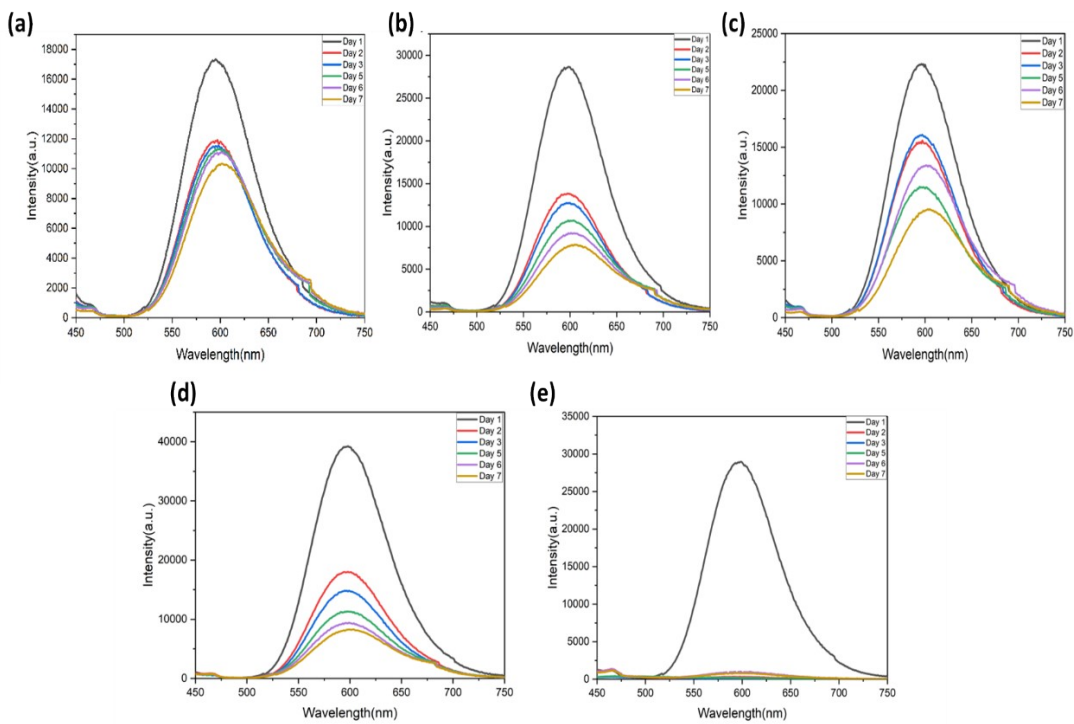

Fig.S3: Stability analysis with PL (a) 0.7 mmol Mn doped CsPbBr<sub>3</sub> (b) 1 mmol Mn doped CsPbBr<sub>3</sub> (c) 1.5 mmol Mn doped CsPbBr<sub>3</sub> (d) 2 mmol Mn doped CsPbBr<sub>3</sub> (e) 3 mmol Mn doped CsPbBr<sub>3</sub> .

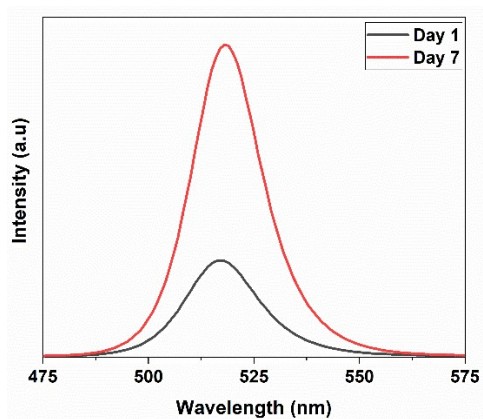

Fig S4: Comparison of PL spectra of bare CsPbBr<sub>3</sub> QD on day 1 and day 7.

## **CALCULATION OF CRYSTALLITE SIZE**

Table S1: Calculation of crystallite size

|                                       | Peak position(2θ) | FWHM | Crystallite size D(nm) | Average D(nm) |
|---------------------------------------|-------------------|------|------------------------|---------------|
| CsPbBr <sub>3</sub>                   | 15.09             | 0.53 | 15.03                  | 12.87         |
|                                       | 30.51             | 0.77 | 10.70                  |               |
| 0.7 mmol Mn doped CsPbBr <sub>3</sub> | 15.54             | 0.43 | 18.66                  | 19.95         |
|                                       | 21.99             | 0.39 | 20.75                  |               |
|                                       | 28.19             | 0.41 | 20.18                  |               |
|                                       | 31.38             | 0.41 | 20.20                  |               |
| 3 mmol Mn doped CsPbBr <sub>3</sub>   | 6.81              | 0.27 | 29.93                  | 28.28         |
|                                       | 9.09              | 0.27 | 29.58                  |               |
|                                       | 11.36             | 0.27 | 29.92                  |               |
|                                       | 13.64             | 0.34 | 23.68                  |               |

Using Scherrer equation we can calculate crystallite size.

$$D = \frac{K\lambda}{\beta \cos\theta} \dots\dots\dots \text{Equation (1)}$$

Where D =crystallites size in nm, K = Scherrer constant=0.9,  $\lambda$  =Wavelength of X-Ray source=0.15406 nm,  $\beta$  = FWHM (radians),  $\theta$ =Peak position (radians).

For CsPbBr<sub>3</sub> the average particle size calculated using Scherrer equation is 12.87 nm. 0.7 mmol Mn doped CsPbBr<sub>3</sub> has the average particle size is 19.95 nm and for 3 mmol Mn doped CsPbBr<sub>3</sub> the average particle size is 28.28 nm.

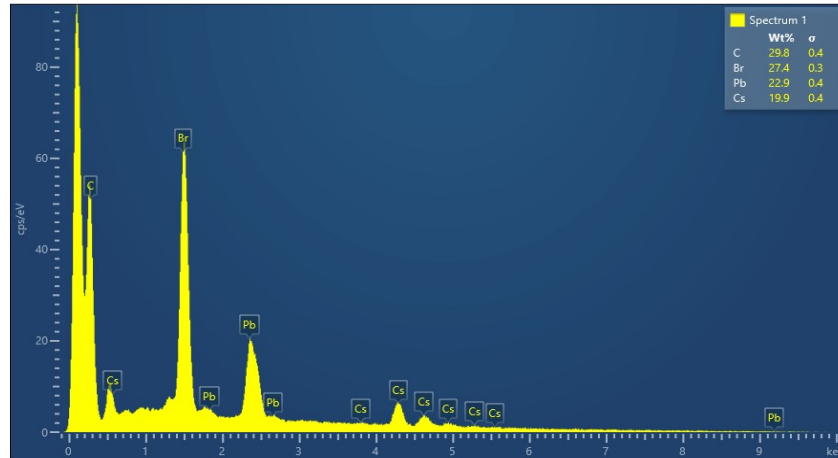

Fig. S5: EDX of CsPbBr<sub>3</sub> QDs

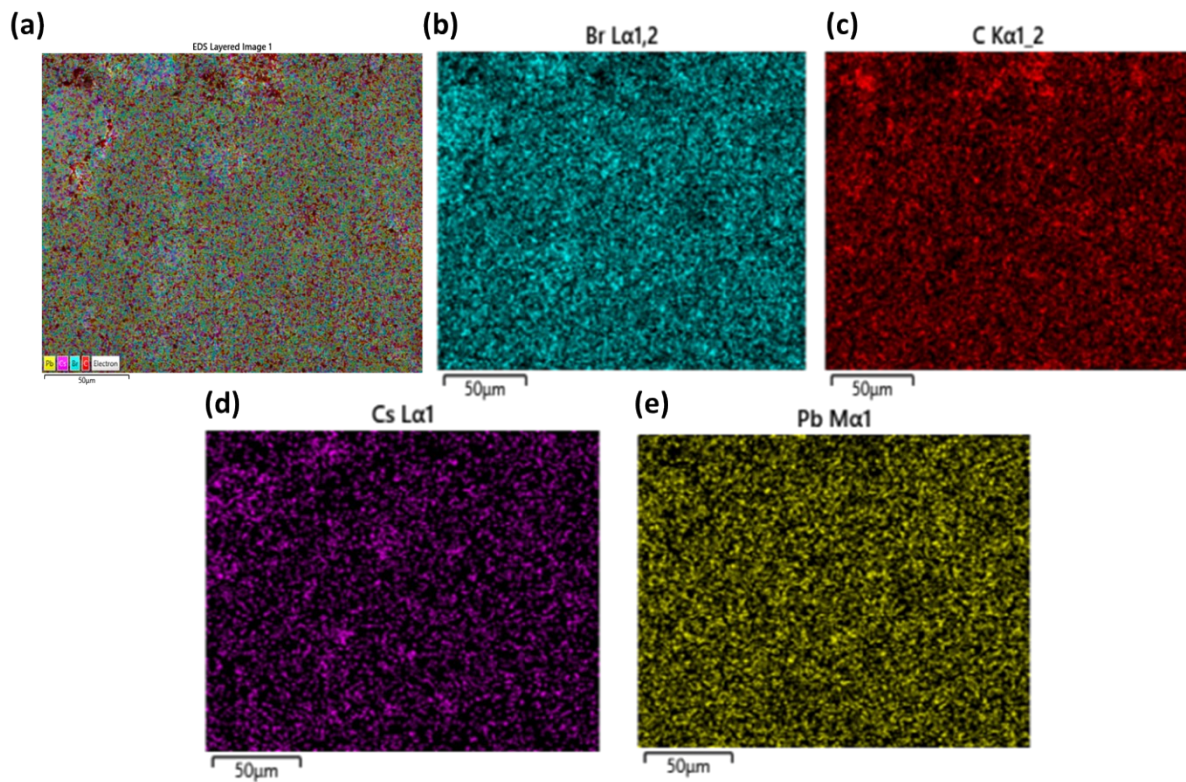

Fig S6: Elemental mapping of CsPbBr<sub>3</sub> QDs



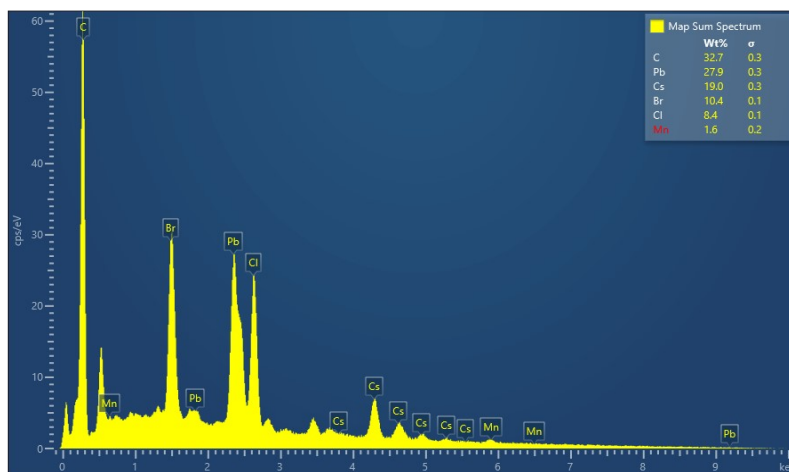

Fig S7: EDX of Mn doped CsPbBr<sub>3</sub> QDs

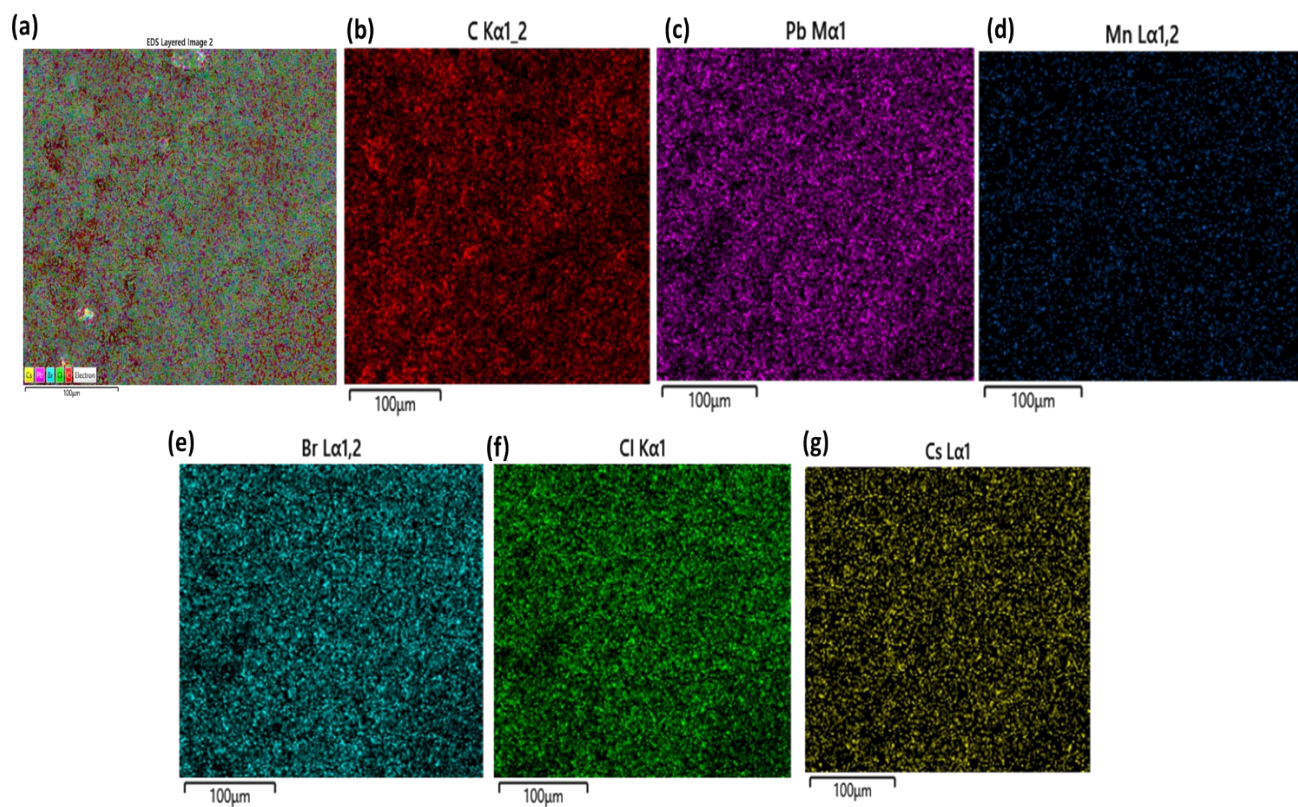

Fig S8: Elemental mapping of Mn doped CsPbBr<sub>3</sub> QDs 0.7 mmol
